# Supplementary material for: High-yield production of multiple O-methylated phenylpropanoids by the engineered Escherichia coli–Streptomyces cocultivation system
Source: PubMed Central journal article supplement (PMC6456975; doi:10.1186/s12934-019-1118-9), 2019-04-10
Supplement: 12934_2019_1118_MOESM1_ESM.pdf [file 12934_2019_1118_MOESM1_ESM.pdf]

## Additional file

# High-yield production of multiple *O*-methylated phenylpropanoids by the engineered *Escherichia coli*-*Streptomyces* cocultivation system

Heqing Cui<sup>1†</sup>, Myoung Chong Song<sup>1†</sup>, Yeon Hee Ban<sup>1</sup>, Soo Youn Jun<sup>2</sup>, An Sung Kwon<sup>2</sup>, Ji Young Lee<sup>1</sup>  
and Yeo Joon Yoon<sup>1\*</sup>

\*Correspondence: [joonyoon@ewha.ac.kr](mailto:joonyoon@ewha.ac.kr)

<sup>†</sup>Equal contributors

<sup>1</sup>Department of Chemistry and Nanoscience, Ewha Womans University, Ewhayeodae-gil 52, Seoul, 03760, Republic of Korea

<sup>2</sup>iNtRON Biotechnology, Inc., Seongnam-si, Gyeonggi-do 13202, Republic of Korea

Email addresses:

Heqing Cui ([cuiheqing810@hotmail.com](mailto:cuiheqing810@hotmail.com)); Myoung Chong Song ([smch517@ewha.ac.kr](mailto:smch517@ewha.ac.kr));

Yeon Hee Ban ([yhban@ewha.ac.kr](mailto:yhban@ewha.ac.kr)); Soo Youn Jun ([jsy@intron.co.kr](mailto:jsy@intron.co.kr));

An Sung Kwon ([kwon4053@intron.co.kr](mailto:kwon4053@intron.co.kr)); Ji Young Lee ([jjj123789@naver.com](mailto:jjj123789@naver.com));

Yeo Joon Yoon ([joonyoon@ewha.ac.kr](mailto:joonyoon@ewha.ac.kr))

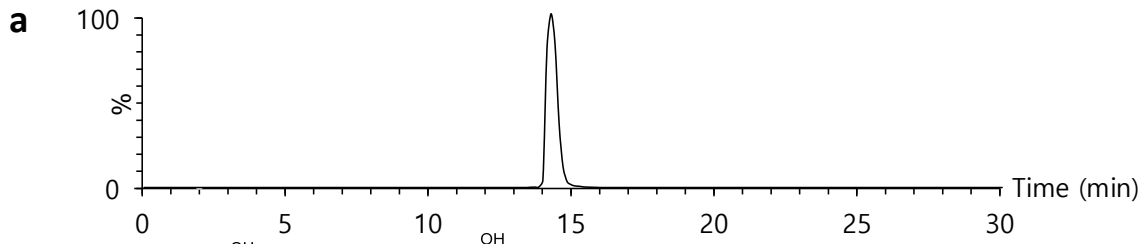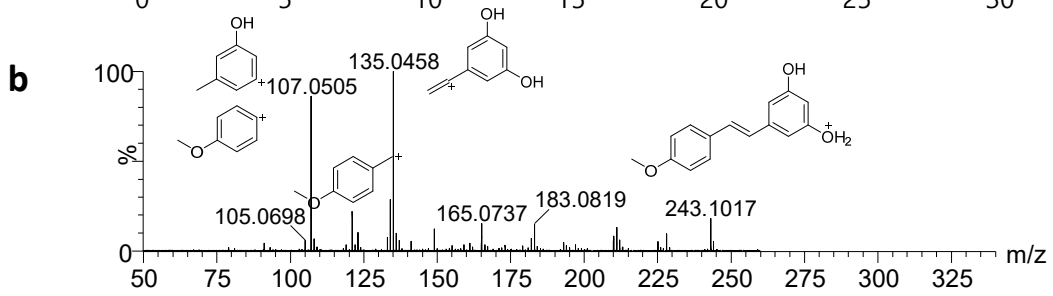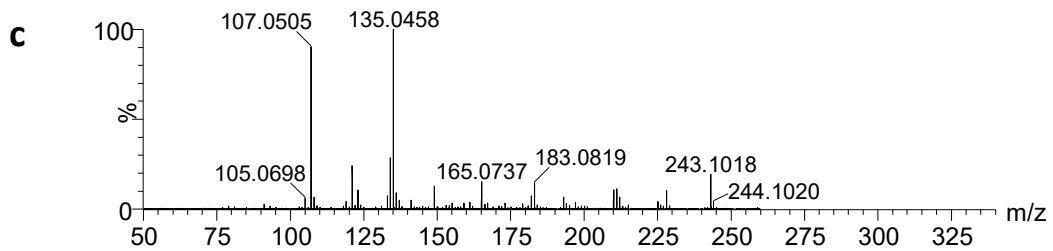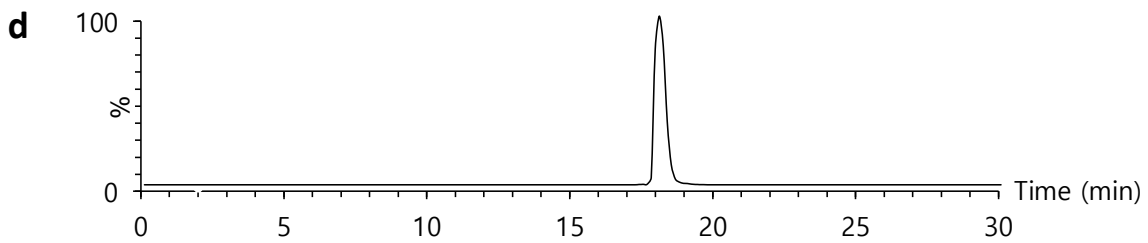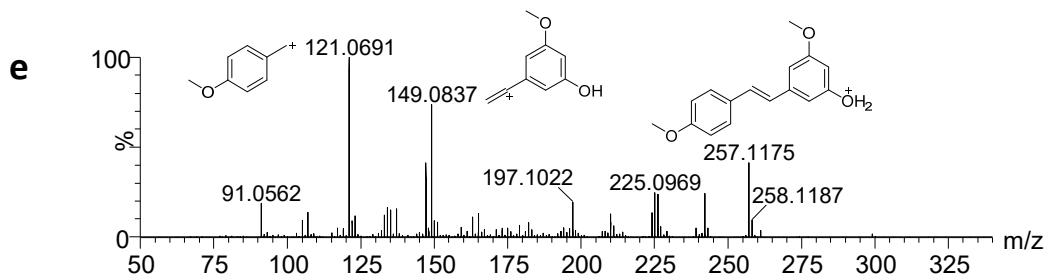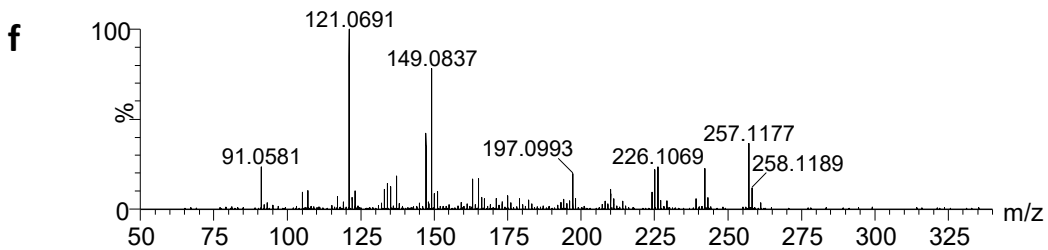

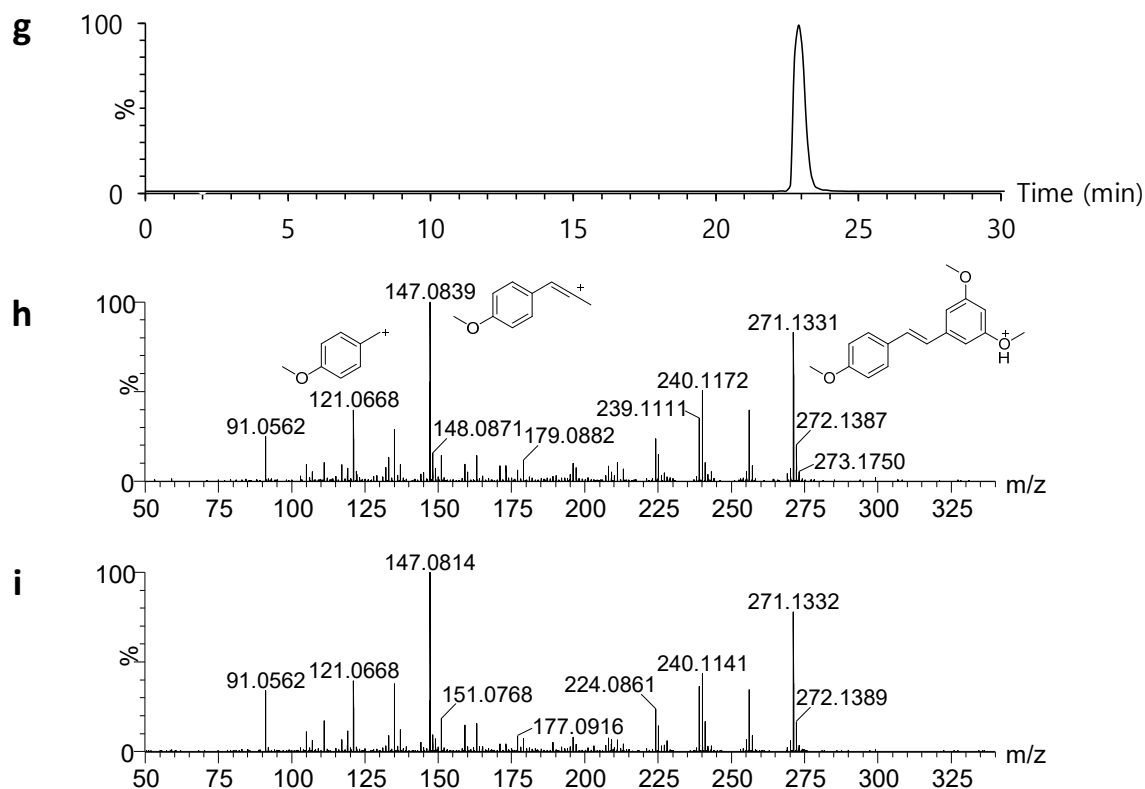

**Figure S1.** UPLC–qTOF–HR-MS analyses of the methylated stilbenes produced by *S. venezuelae* DHS2001 harboring pSE-SaOMT2 (DHS2001/SaOMT2). (a) UPLC–qTOF–HR-MS chromatogram selected for  $m/z=243.1016$  corresponding to standard desoxyrhapontigenin. (b) MS/MS spectrum of standard desoxyrhapontigenin. (c) MS/MS spectrum of desoxyrhapontigenin from the culture extracts of DHS2001/SaOMT2 supplemented with resveratrol. (d) UPLC–qTOF–HR-MS chromatogram selected for  $m/z=257.1172$  corresponding to standard 5-hydroxy-3,4'-dimethoxystilbene. (e) MS/MS spectrum of standard 5-hydroxy-3,4'-dimethoxystilbene. (f) MS/MS spectrum of 5-hydroxy-3,4'-dimethoxystilbene from the culture extracts of DHS2001/SaOMT2 supplemented with resveratrol. (g) UPLC–qTOF–HR-MS chromatogram selected for  $m/z=271.1329$  corresponding to standard 3,5,4'-trimethoxystilbene. (h) MS/MS spectrum of standard 3,5,4'-trimethoxystilbene. (i) MS/MS spectrum of 3,5,4'-trimethoxystilbene from the culture extracts of DHS2001/SaOMT2 supplemented with resveratrol.

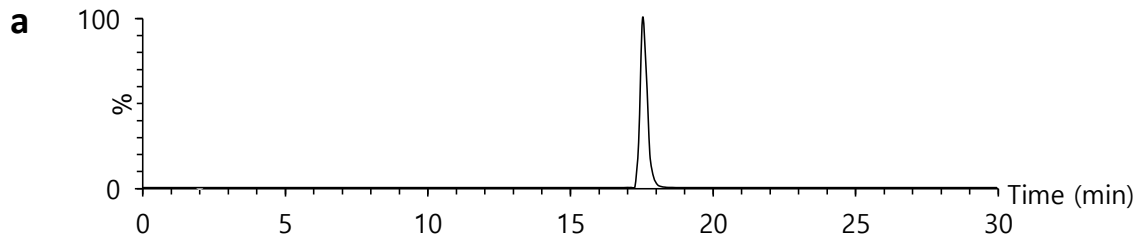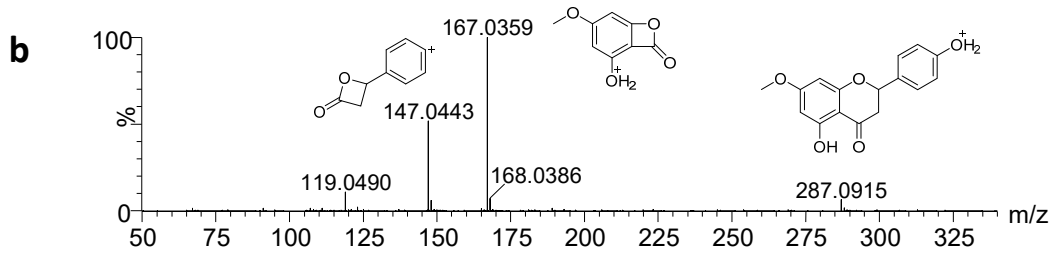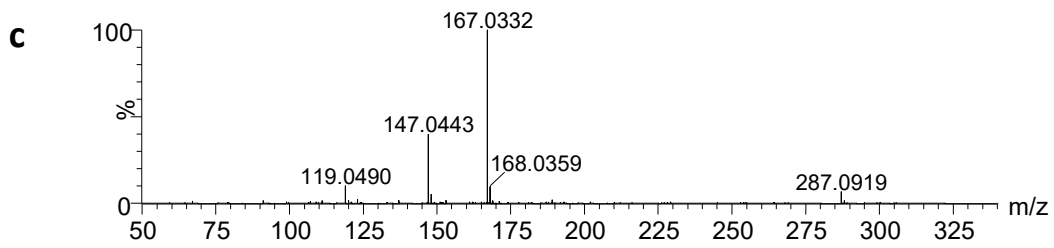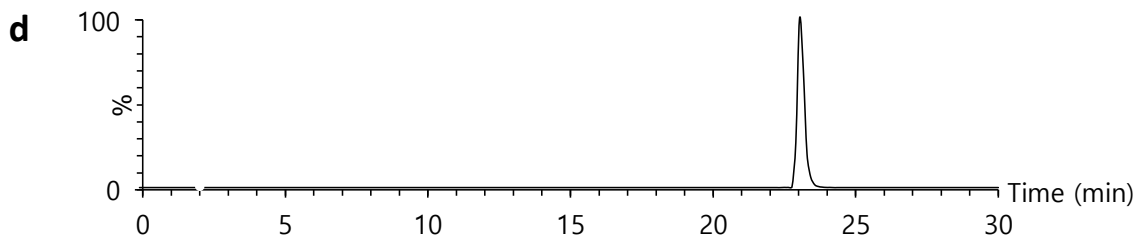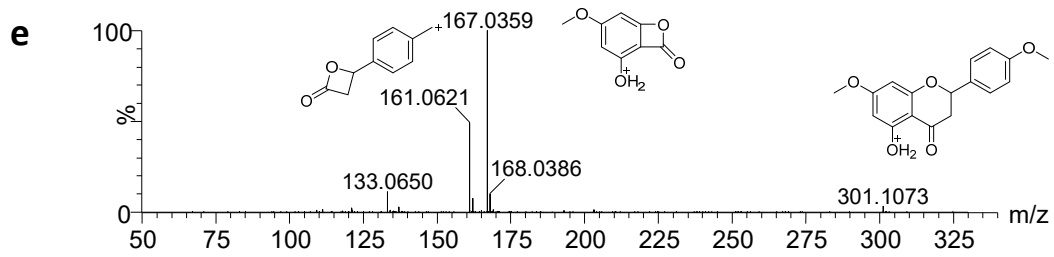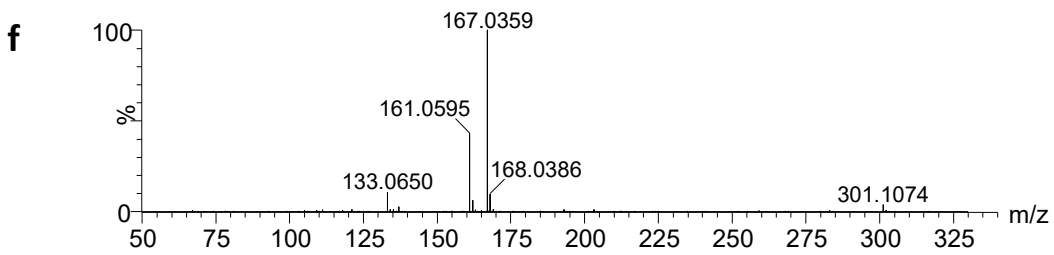

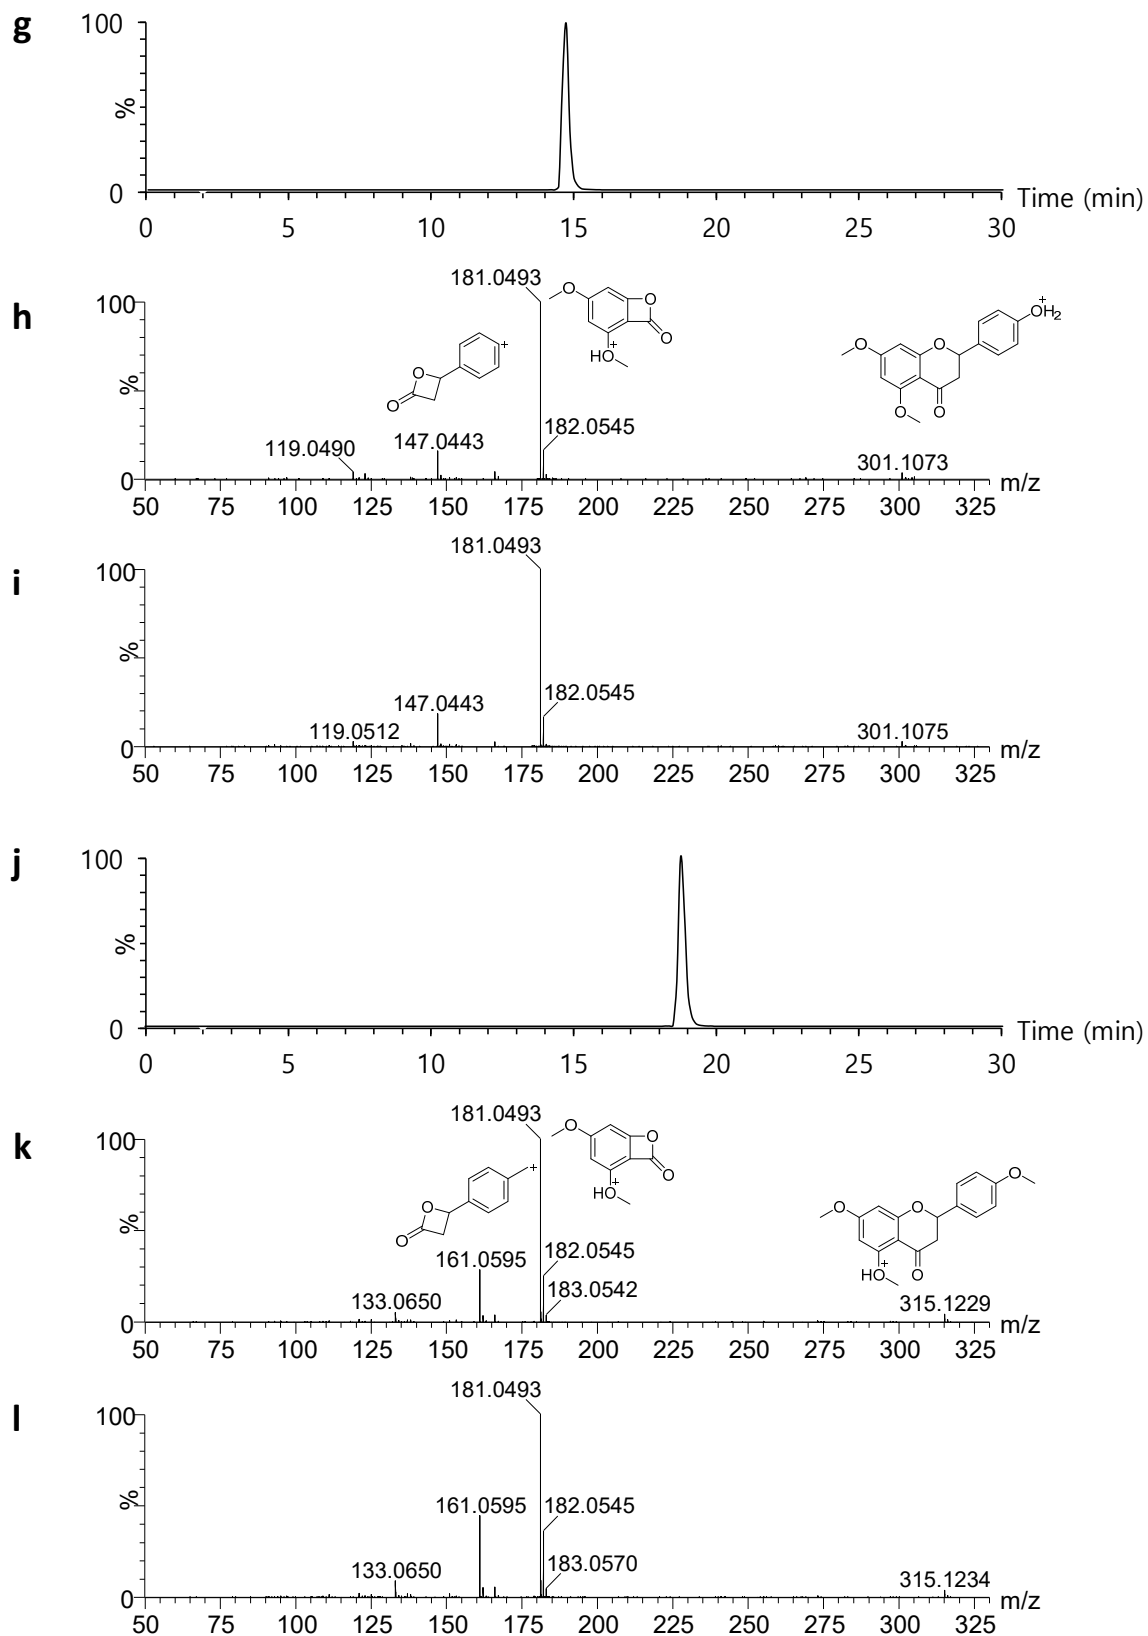

**Figure S2.** UPLC–qTOF–HR-MS analyses of the methylated flavanones produced by *S. venezuelae*

DHS2001 harboring pSE-SaOMT2 (DHS2001/SaOMT2). **(a)** UPLC-qTOF-MS chromatogram selected for  $m/z=287.0914$  corresponding to standard sakuranetin. **(b)** MS/MS spectrum of standard sakuranetin. **(c)** MS/MS spectrum of sakuranetin from the culture extracts of DHS2001/SaOMT2 supplemented with naringenin. **(d)** UPLC-qTOF-HR-MS chromatogram selected for  $m/z=301.1071$  corresponding to standard 5-hydroxy-7,4'-dimethoxyflavanone. **(e)** MS/MS spectrum of standard 5-hydroxy-7,4'-dimethoxyflavanone. **(f)** MS/MS spectrum of 5-hydroxy-7,4'-dimethoxyflavanone from the culture extracts of DHS2001/SaOMT2 supplemented with naringenin. **(g)** UPLC-qTOF-HR-MS chromatogram selected for  $m/z=301.1071$  corresponding to standard 4'-hydroxy-5,7-dimethoxyflavanone. **(h)** MS/MS spectrum of standard 4'-hydroxy-5,7-dimethoxyflavanone. **(i)** MS/MS spectrum of 4'-hydroxy-5,7-dimethoxyflavanone from the culture extracts of DHS2001/SaOMT2 supplemented with naringenin. **(j)** UPLC-qTOF-HR-MS chromatogram selected for  $m/z=315.1227$  corresponding to standard 5,7,4'-trimethoxyflavanone. **(k)** MS/MS spectrum of standard 5,7,4'-trimethoxyflavanone. **(l)** MS/MS spectrum of 5,7,4'-trimethoxyflavanone from the culture extracts of DHS2001/SaOMT2 supplemented with naringenin.

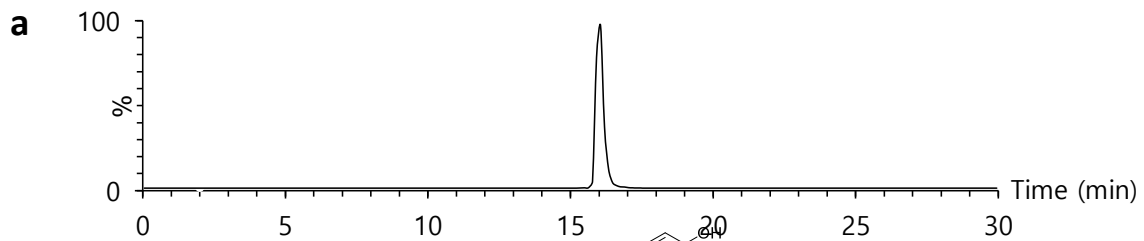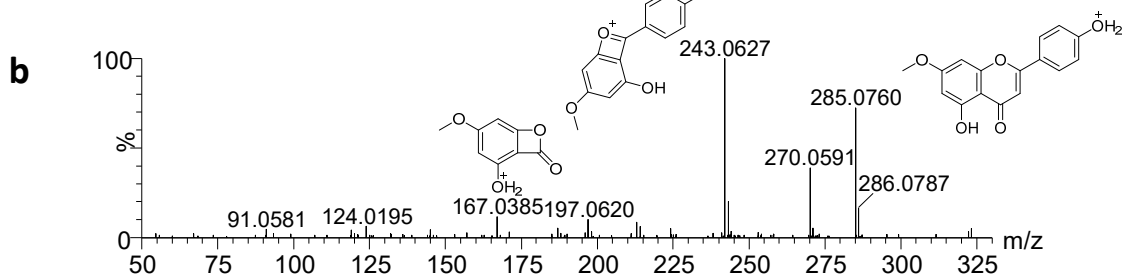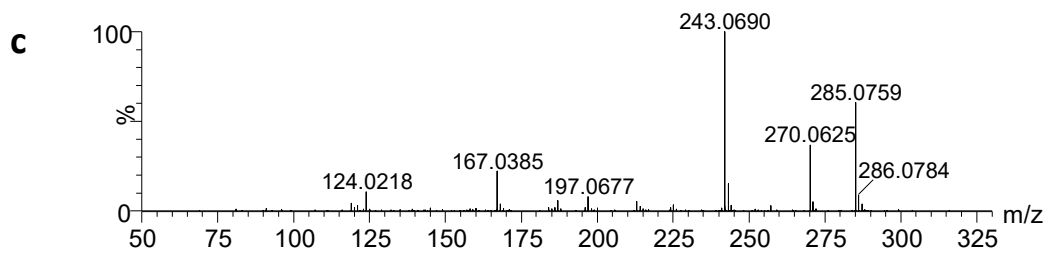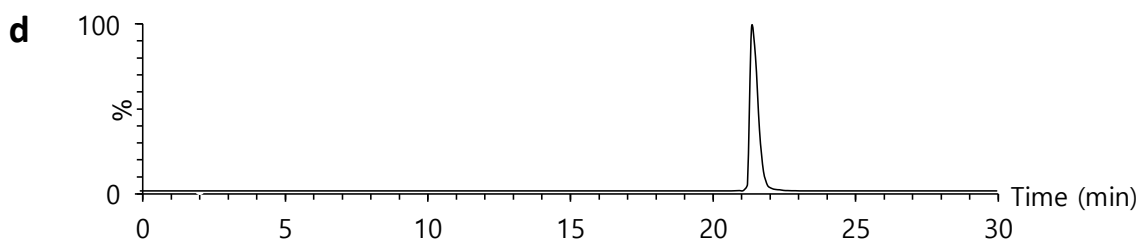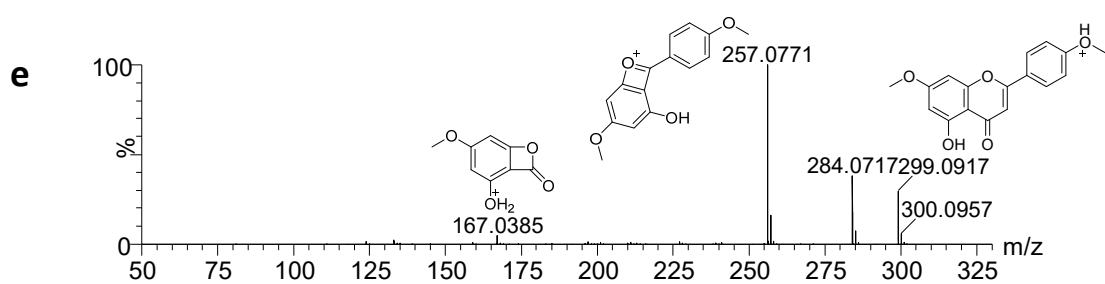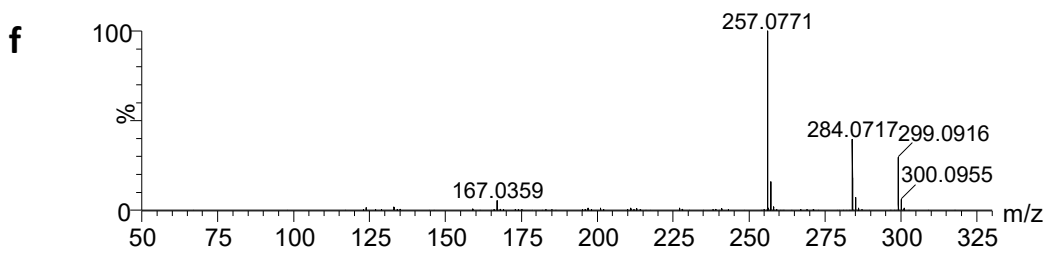

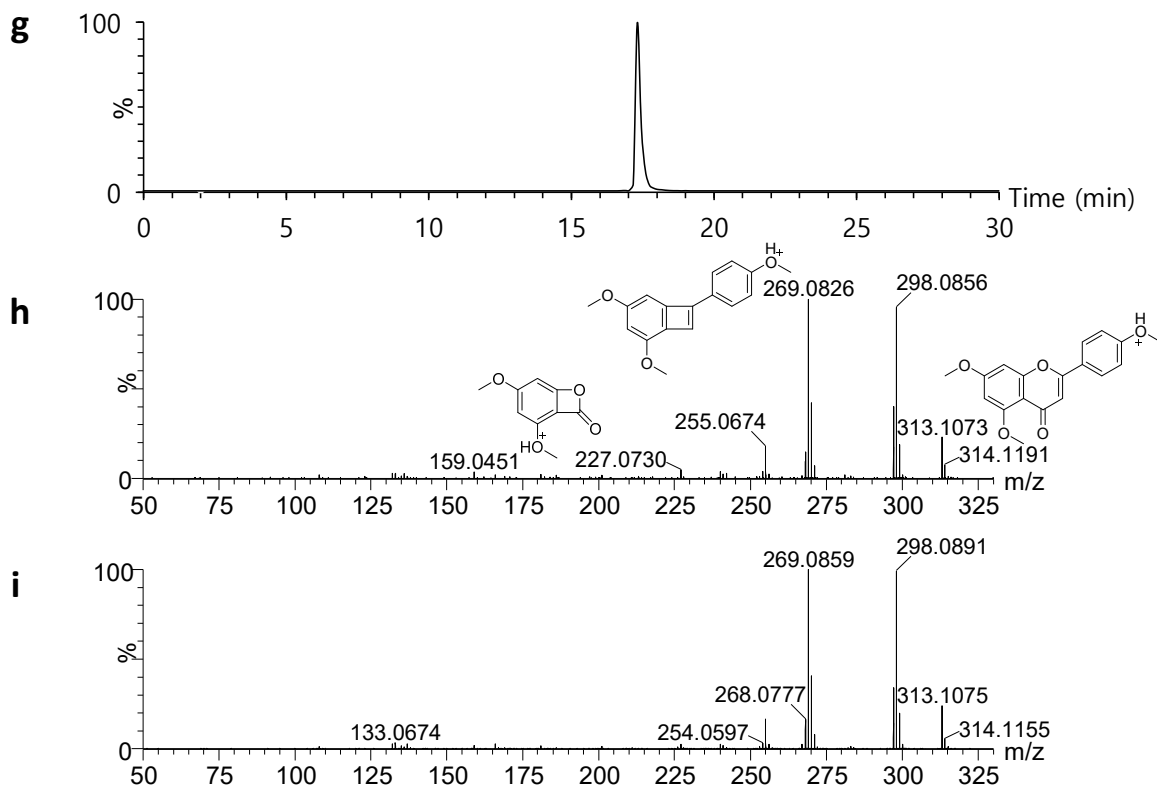

**Figure S3.** UPLC–qTOF–HR-MS analyses of the methylated flavones produced by *S. venezuelae* DHS2001 harboring pSE-SaOMT2 (DHS2001/SaOMT2). (a) UPLC–qTOF–HR-MS chromatogram selected for  $m/z=285.0757$  corresponding to standard genkwanin. (b) MS/MS spectrum of standard genkwanin. (c) MS/MS spectrum of genkwanin from the culture extracts of DHS2001/SaOMT2 supplemented with apigenin. (d) UPLC–qTOF–HR-MS chromatogram selected for  $m/z=299.0914$  corresponding to standard 5-hydroxy-7,4'-dimethoxyflavone. (e) MS/MS spectrum of standard 5-hydroxy-7,4'-dimethoxyflavone. (f) MS/MS spectrum of 5-hydroxy-7,4'-dimethoxyflavone from the culture extracts of DHS2001/SaOMT2 supplemented with apigenin. (g) UPLC–qTOF–HR-MS chromatogram selected for  $m/z=313.1071$  corresponding to standard 5,7,4'-trimethoxyflavone. (h) MS/MS spectrum of standard 5,7,4'-trimethoxyflavone. (i) MS/MS spectrum of 5,7,4'-trimethoxyflavone from the culture extracts of DHS2001/SaOMT2 supplemented with apigenin.



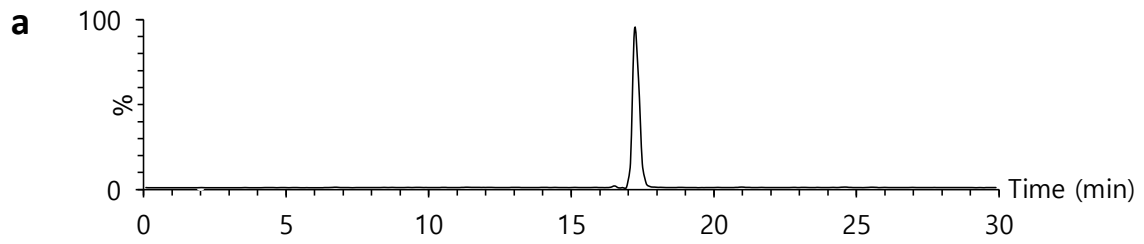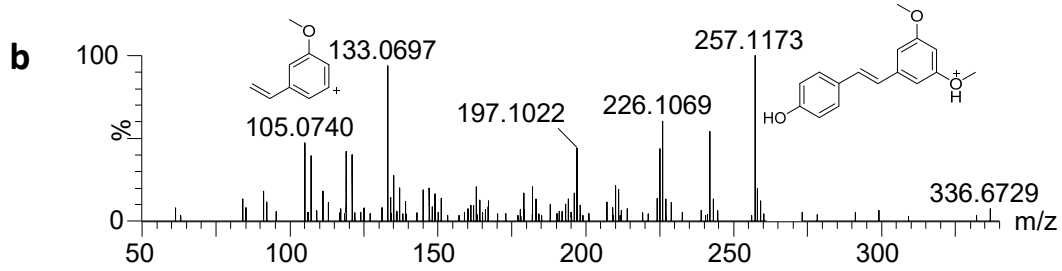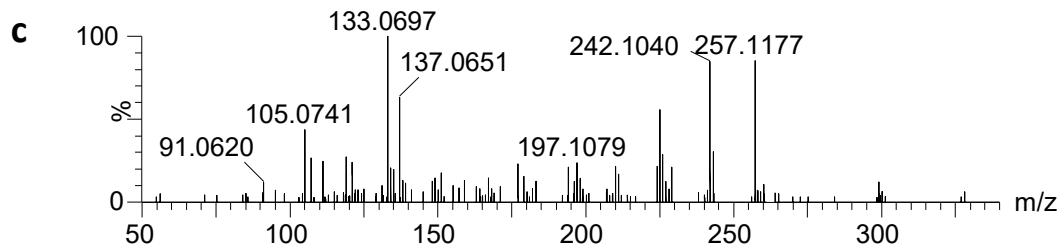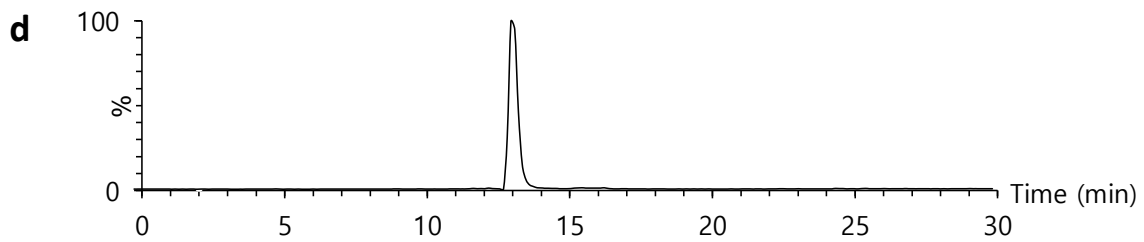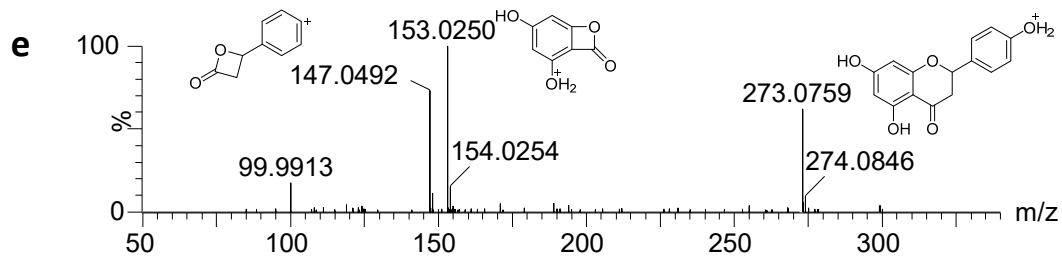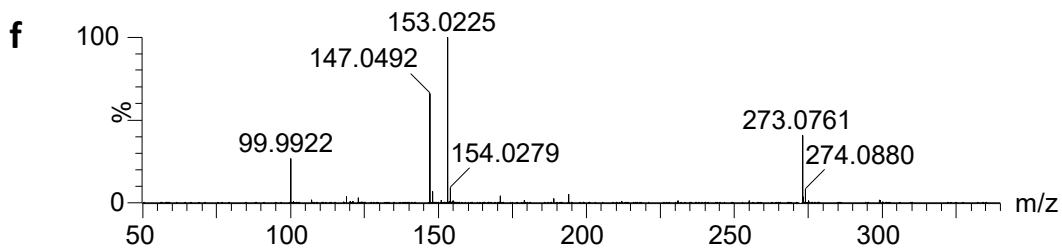

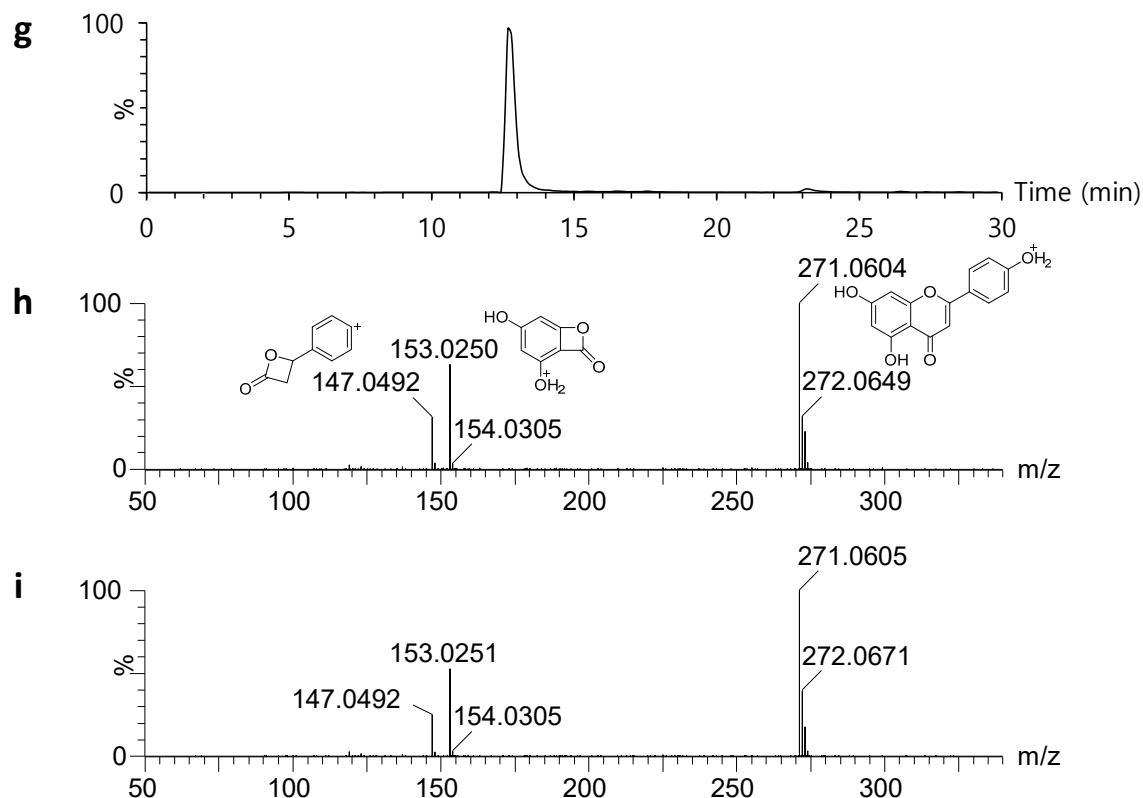

**Figure S4.** UPLC–qTOF–HR-MS analyses of the pterostilbene, naringenin and apigenin produced by *E. coli* mutants. **(a)** UPLC–qTOF–HR-MS chromatogram selected for  $m/z=257.1172$  corresponding to standard pterostilbene. **(b)** MS/MS spectrum of standard pterostilbene. **(c)** MS/MS spectrum of pterostilbene obtained from BL21/PTS supplemented with 4-coumaric acid. **(d)** UPLC–qTOF–HR-MS chromatogram selected for  $m/z=273.0757$  corresponding to standard naringenin. **(e)** MS/MS spectrum of standard naringenin. **(f)** MS/MS spectrum of naringenin obtained from BL21/NRG supplemented with 4-coumaric acid. **(g)** UPLC–qTOF–HR-MS chromatogram selected for  $m/z=271.0601$  corresponding to standard apigenin. **(h)** MS/MS spectrum of standard apigenin. **(i)** MS/MS spectrum of apigenin obtained from BL21/APG supplemented with 4-coumaric acid.

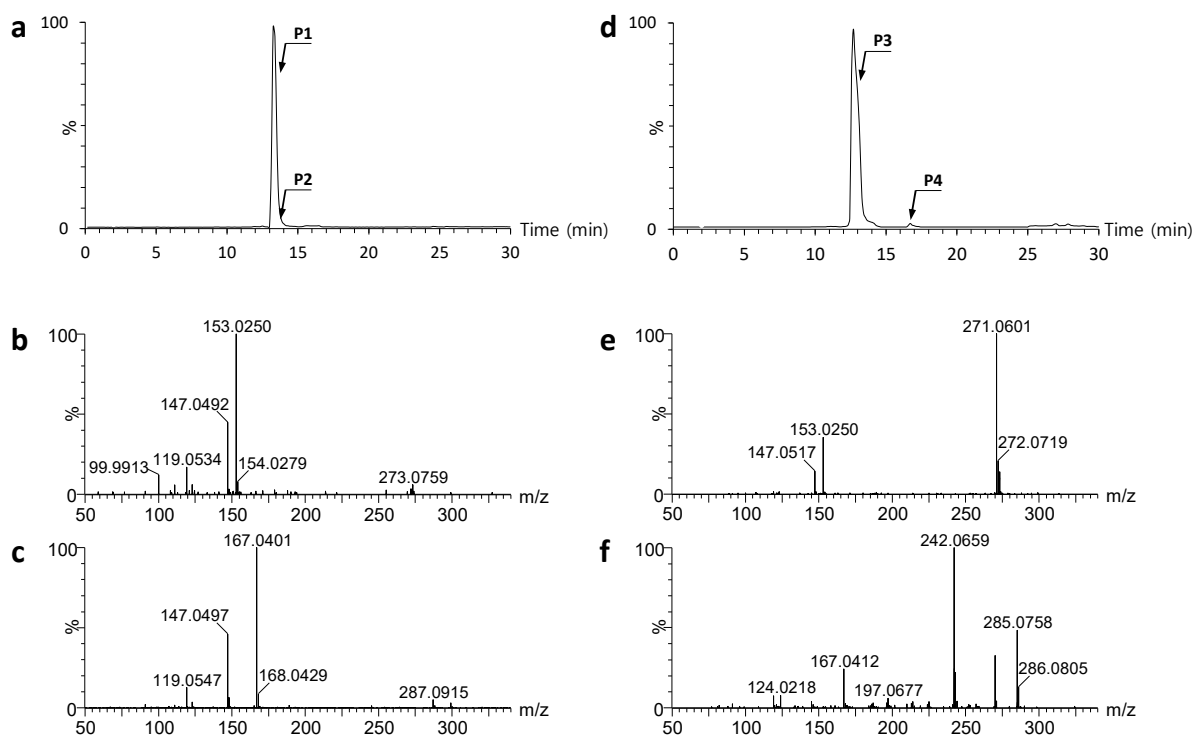

**Figure S5.** UPLC–qTOF–HR-MS analyses of methylated flavanone and methylated flavone produced by *E. coli* BL21(DE3) harboring pNRG-SaOMT2 and pAPG-SaOMT2, respectively. (a) UPLC–qTOF–HR-MS chromatogram selected for  $m/z=273.0757$  and  $287.0914$  corresponding to naringenin (**P1**) and sakuranetin (**P2**), respectively, of culture extracts from BL21/NRG-SaOMT2. (b) MS/MS spectrum selected for  $m/z=273.0757$  of naringenin obtained from BL21/NPG-SaOMT2 supplemented with 4-coumaric acid. (c) MS/MS spectrum selected for  $m/z=287.0914$  of sakuranetin obtained from BL21/NPG-SaOMT2 supplemented with 4-coumaric acid. (d) UPLC–qTOF–HR-MS chromatogram selected for  $m/z=271.0601$  and  $285.0757$  corresponding to apigenin (**P3**) and genkwainin (**P4**), respectively, of culture extracts obtained from BL21/APG-SaOMT2. (e) MS/MS spectrum selected for  $m/z=271.0601$  of apigenin obtained from BL21/APG-SaOMT2 supplemented with 4-coumaric acid. (f) MS/MS spectrum selected for  $m/z=285.0757$  of genkwainin obtained from BL21/APG-SaOMT2 supplemented with 4-coumaric acid.

**Table S1.** List of oligonucleotide primers used in this study

| Primers     | Primer sequences (5' to 3', restriction site underlined)                  |
|-------------|---------------------------------------------------------------------------|
| SaOMT2-1_F  | <u>GAATTC</u> ATGAGCTGCCGCACCGGC                                          |
| SaOMT2-1_R  | <u>CCTAGG</u> TCAACCTACGGCCCGCAA                                          |
| SaOMT2-H1_R | <u>CCTAGG</u> TCAGTGGTGGTGGTGGTGGTGGCCAACCGCGCGCAGTTC                     |
| SaOMT2-H2_F | <u>TCTAGAA</u> AATAATTTTGTTTAACTTTAAGAAGGAGATATACATATGAGTTGT<br>CGTACTGGT |
| SaOMT2-H2_R | <u>GCGGCCG</u> CACCTACGGCCCGCAA                                           |
| Os4CL_F     | <u>TCTAGAG</u> GAGGATTACAATGGGGTCGGTGGCGGCG                               |
| Os4CL_R     | <u>AAGCTT</u> TTAGCTGCTTTTGGGCGC                                          |
| VvSTS_F     | <u>AAGCTT</u> AGGAGGATTACAAAATGGCTTCAGTCGAGGAA                            |
| VvSTS_R     | <u>CCTAGG</u> TTAATTTGTAACCAT                                             |
| VvROMT_F    | <u>CCTAGG</u> GAGGAGGATTACAAAATGGATTTGGCAAACGGT                           |
| VvROMT_R    | <u>GCGGCCG</u> CTCAAGGATAAACCTCAAT                                        |
| Os4CL-2_F   | <u>AAGCTT</u> AGGAGGATTACAATGGGGTCGGTGGCGGCG                              |
| Os4CL-2_R   | <u>GCGGCCG</u> CTTAGCTGCTTTTGGGCGC                                        |
| PeCHS_F     | <u>CCATGG</u> AGATGGCACCGTCGATTGAG                                        |
| PeCHS_R     | <u>AAGCTT</u> AATAAGCTTTCATGAGTAAATTGTTTG                                 |
| MtCHI_F     | <u>CATATG</u> ATGGCTGCATCAATCACC                                          |
| MtCHI_R     | <u>CCTAGG</u> GGTACCTCAGTTTCCAATCTTGAA                                    |
| PcFNS_F     | <u>GGTACC</u> AGGAGGATTACAATGGCTCCTACAACAATA                              |
| PcFNS_R     | <u>CCTAGG</u> CTAAGCTAAATTTTCATC                                          |
| SaOMT2-2_F  | <u>CCTAGG</u> GAGGAGGTCTCGCATGAGTTGTCGTAAGTGGT                            |
| SaOMT2-2_R  | <u>GCGGCCG</u> CTCAACCTACGGCCCGCAA                                        |
